# Supplementary material for: Evaluation of the Toxic Activity of the Graphene Oxide in the Ex Vivo Model of Human PBMC Infection with Mycobacterium tuberculosis
Source: MDPI journal article supplement (doi:10.3390/microorganisms11030554), 2023-02-22

**Supplementary Figure S1.** Representative atomic force microscopy image of a single GO sheet from the diluted water dispersion and the relative height profile. GO sheets. Sample has a hydrodynamic radius ranging from 500 to 600 nm and an average height of 1nm, indicating single-layered GO sheets.

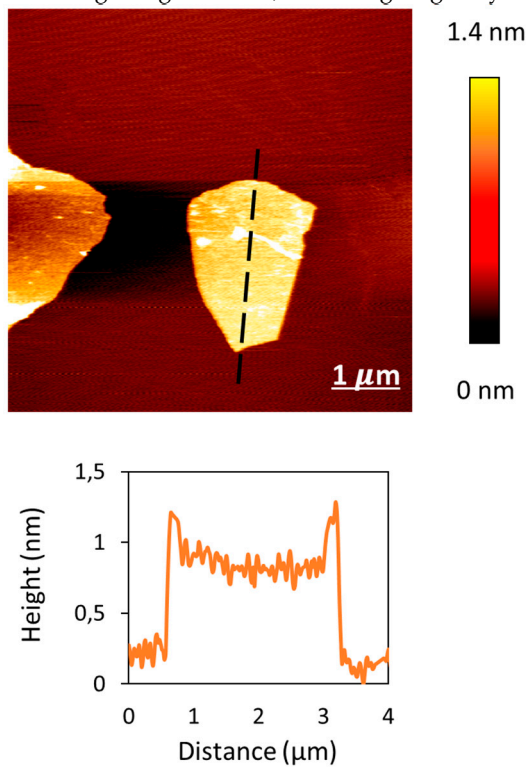

**Supplementary Figure S2.** GO auto-fluorescence and GO-7AAD complexation evaluated through cytofluorimetric analysis. RPMI cell culture medium added with GO 10 (C,D and I, J) and 100  $\mu\text{g/ml}$  (E, F and K, L). RPMI without GO was used as control (A, B and G, H) and then incubated with or without 7AAD. Samples incubated without 7AAD (A-F) were analysed through Side Scatter versus Forward Scatter gating, and then through PC5-5-A versus Side Scatter gating. Sample incubated with 7AAD (G-L) were analysed through Side Scatter versus Forward Scatter gating, and then through 7AAD PC5-5-A versus Side Scatter gating.

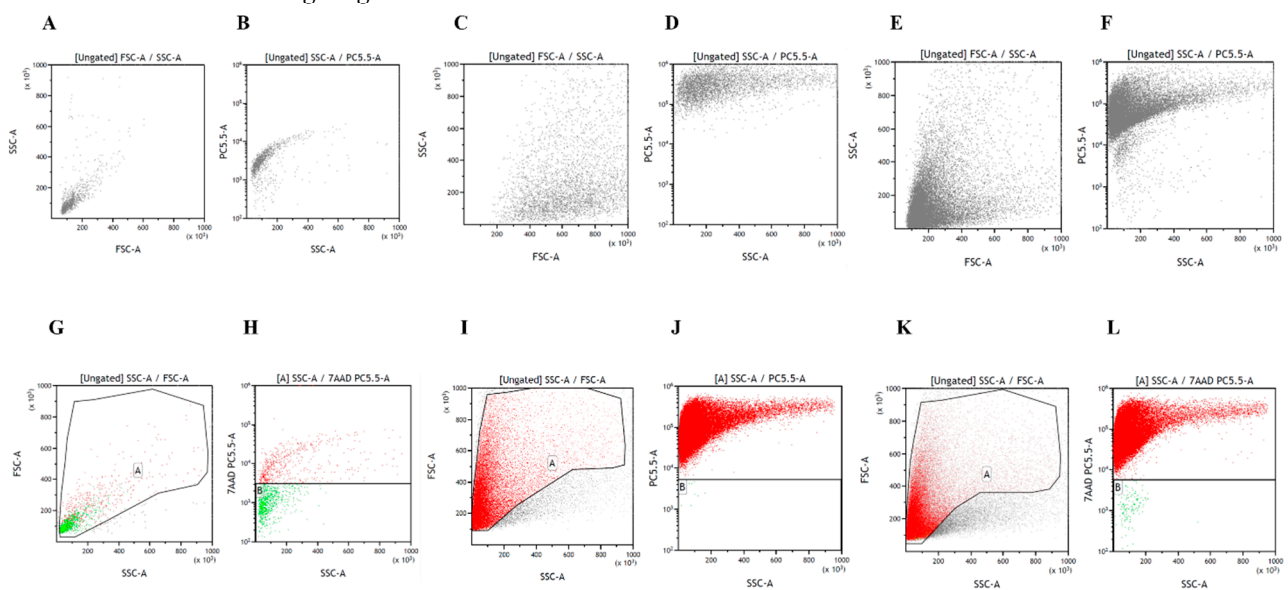

Supplement: s1 [file s1]
